# Multivalent Human Papillomavirus L1 DNA Vaccination Utilizing Electroporation

Kihyuck Kwak<sup>1</sup>, Rosie Jiang<sup>1</sup>, Subhashini Jagu<sup>1</sup>, Joshua W. Wang<sup>1</sup>, Chenguang Wang<sup>2</sup>, Neil D. Christensen<sup>3</sup>, Richard B. S. Roden<sup>1\*</sup>

**1** Department of Pathology, Johns Hopkins University, Baltimore, Maryland, United States of America, **2** Department of Biostatistics, Johns Hopkins University, Baltimore, Maryland, United States of America, **3** Departments of Pathology, Microbiology and Immunology, Penn State University, Hershey, Pennsylvania, United States of America

## Abstract

**Objectives:** Naked DNA vaccines can be manufactured simply and are stable at ambient temperature, but require improved delivery technologies to boost immunogenicity. Here we explore in vivo electroporation for multivalent codon-optimized human papillomavirus (HPV) L1 and L2 DNA vaccination.

**Methods:** Balb/c mice were vaccinated three times at two week intervals with a fusion protein comprising L2 residues ~11–88 of 8 different HPV types (11–88×8) or its DNA expression vector, DNA constructs expressing L1 only or L1+L2 of a single HPV type, or as a mixture of several high-risk HPV types and administered utilizing electroporation, i.m. injection or gene gun. Serum was collected two weeks and 3 months after the last vaccination. Sera from immunized mice were tested for *in-vitro* neutralization titer, and protective efficacy upon passive transfer to naive mice and vaginal HPV challenge. Heterotypic interactions between L1 proteins of HPV6, HPV16 and HPV18 in 293TT cells were tested by co-precipitation using type-specific monoclonal antibodies.

**Results:** Electroporation with L2 multimer DNA did not elicit detectable antibody titer, whereas DNA expressing L1 or L1+L2 induced L1-specific, type-restricted neutralizing antibodies, with titers approaching those induced by Gardasil. Co-expression of L2 neither augmented L1-specific responses nor induced L2-specific antibodies. Delivery of HPV L1 DNA via in vivo electroporation produces a stronger antibody response compared to i.m. injection or i.d. ballistic delivery via gene gun. Reduced neutralizing antibody titers were observed for certain types when vaccinating with a mixture of L1 (or L1+L2) vectors of multiple HPV types, likely resulting from heterotypic L1 interactions observed in co-immunoprecipitation studies. High titers were restored by vaccinating with individual constructs at different sites, or partially recovered by co-expression of L2, such that durable protective antibody titers were achieved for each type.

**Discussion:** Multivalent vaccination via in vivo electroporation requires spatial separation of individual type L1 DNA vaccines.

**Citation:** Kwak K, Jiang R, Jagu S, Wang JW, Wang C, et al. (2013) Multivalent Human Papillomavirus L1 DNA Vaccination Utilizing Electroporation. PLoS ONE 8(3): e60507. doi:10.1371/journal.pone.0060507

**Editor:** Zhi-Ming Zheng, National Institute of Health - National Cancer Institute, United States of America

**Received:** December 20, 2012; **Accepted:** February 27, 2013; **Published:** March 25, 2013

**Copyright:** © 2013 Kwak et al. This is an open-access article distributed under the terms of the Creative Commons Attribution License, which permits unrestricted use, distribution, and reproduction in any medium, provided the original author and source are credited.

**Funding:** This study was funded by US Public Health Service grants CA118790 and P50 CA098252 (grants.nih.gov). The funders had no role in study design, data collection and analysis, decision to publish, or preparation of the manuscript.

**Competing Interests:** The authors have read the journal's policy and have the following conflicts. Subhashini Jagu and Richard Roden are co-inventors on L2 patents (20090047301 Papillomavirus L2 N-Terminal Peptides for the Induction of Broadly Cross-Neutralizing Antibodies and 20100297144 MULTITYPE HPV PEPTIDE COMPOSITIONS AND METHODS FOR TREATMENT OR PREVENTION OF HUMAN PAPILOMAVIRUS INFECTION) licensed to Shantha Biotechnics Ltd., GlaxoSmithKline, PaxVax, Inc. and Acambis, Inc and have received research funding from Shantha Biotechnics Ltd., Sanofi Pasteur and GlaxoSmithKline and Richard Roden is a founder of Papivax LLC. The terms of these arrangements are managed by Johns Hopkins University in accordance with its conflict of interest policies. This does not alter the authors' adherence to all the PLoS ONE policies on sharing data and materials.

\* E-mail: roden@jhmi.edu

## Introduction

Persistent infection by oncogenic human papillomavirus (HPV) drives the development of cervical cancer [1]. HPV infection also causes subsets of other cancers such as vulvar, vaginal, penile, anal, and oropharyngeal cancers [2,3,4]. The importance of preventing HPV infection drove the development of two commercial virus-like particle-based (VLP) vaccines, Gardasil<sup>®</sup> by MSD and Cervarix<sup>®</sup> by GSK, respectively. These two L1 VLP-based vaccines elicit robust type-restricted neutralizing antibodies that effectively inhibit HPV infection [5,6,7,8,9,10,11]. However, Gardasil<sup>®</sup> and Cervarix<sup>®</sup> each contain L1 VLP derived from

only two high risk genotypes, HPV16 and HPV18, although Gardasil also contains L1 VLP derived from the two most common genotypes causing benign genital warts, HPV6 and HPV11. Since HPV16 and HPV18 cause 50% and 20% of all cervical cancers [12,13], the two licensed vaccines are potentially able to prevent most but not all cases of cervical cancer because of the type-restricted immunity [14,15]. However, HPV16 causes ~90% of cases of HPV-associated vaginal, vulvar, anal and oropharyngeal cancers, suggesting a distinct type distribution at these anatomic sites [2,3,4]. Passive transfer studies in animal models of HPV infection suggest that the type-restricted neutralizing antibodies induced by L1 VLP vaccination effect protection,

although a role for cellular immunity has not been excluded [16]. The breadth of protection may be expanded by simply increasing the number of L1 VLP of different HPV genotypes, although this increases the cost and complexity of production. Merck is currently testing a nonavalent L1 VLP vaccine that targets the seven most common HPV genotypes found in cervical cancer and two types that cause most cases of genital warts [17].

The minor capsid protein, L2, harbors several conserved neutralizing epitopes at its amino terminus that elicits cross-protection among diverse HPV types [18,19,20,21]. However, by comparison to L1 VLP, weaker immunogenicity is an obstacle L2 vaccine development [20,22]. Several attempts have been made to enhance immunogenicity of L2 conserved epitopes and create a single vaccine protective against most high-risk HPV types. For example, L2 epitopes have been displayed repetitively by generating L2 multimer fusion proteins, or insertion into the immunodominant neutralizing epitope of VLPs of HPV and other viruses [23,24,25,26].

Cost and the need for a cold chain are barriers to global implementation of HPV immunization. Unfortunately, 85% of cervical cancer cases occur in women in developing countries and even the tiered pricing for the two licensed vaccines is beyond the reach of many lower income countries [27]. The L2 multimer vaccine can be manufactured as a single protein in the *E. coli* system lowering its cost compared to multivalent L1 based vaccines produced in yeast or insect cells [28,29,30]. However, protein-based vaccines are prone to degradation at ambient temperature and typically require refrigeration such that development of heat-stable formulations is needed to facilitate implementation in low income and remote populations [30].

Naked DNA vaccines encoding vaccine antigens have several potential advantages. Production of DNA vaccines does not require culture, inactivation of infectious pathogens, and their purification from bacteria is well standardized and comparatively inexpensive [31]. Importantly, naked DNA can be readily stored at ambient temperature. Moreover, the antigenic structure of the vaccine antigen produced by DNA vaccination likely closely resembles the appropriate native structure with the correct post-translational modifications. Indeed, L1 expressed in *E. coli* does not form regular VLPs and requires *in vitro* disassembly and re-assembly [29,32]. Furthermore, the DNA vector itself can have an adjuvant effect via its inherent immunostimulatory elements. Unmethylated CpG dinucleotide motifs can be sensed by Toll-like receptor (TLR)-9 [33], a microbial pattern recognition receptor (PRR), and trigger innate inflammatory responses [34,35,36]. DNA in the cytoplasm can be recognized and stimulate Absent In Melanoma 2 (AIM2) [37], and Stimulator of IFN Genes (STING) pathways [38]. DNA vaccines also provide sustained antigen expression for a prolonged immune stimulation compared to the short half-life of protein antigens [39]. Despite many advantages over protein vaccines, low immunogenicity is a major shortcoming of DNA vaccines, and is believed to reflect inefficiency of delivery of the vaccine to the host nucleus.

There are several alternative modes of DNA administration that can overcome inefficient delivery. The gene gun provides ballistic delivery of gold particles coated with DNA to cells in the skin including professional antigen presenting cells, termed Langerhans cells [40,41]. While the method is more efficient than *i.m.* injection, only a limited amount of DNA can be used due to technical issues. A second improved method of DNA delivery via *in vivo* electroporation elicits robust immune responses as a consequence of increased transfection of somatic cells and inflammation caused by localized cell death [42,43,44]. The potential of electroporation in clinical trials has recently been

demonstrated with DNA vaccines targeting hepatitis B virus [45], HIV [46,47] and HPV oncoproteins, E6 and E7 [48].

Here we show the potential of L1-expressing DNA vaccines administered with electroporation as a prophylactic vaccine. In addition, our results also demonstrate interference between L1 DNA vaccines administered at the same site with electroporation, likely reflecting co-assembly of different L1 into chimeric particles rather than immunologic competition. Finally, we find that this interference can be eliminated if L1 DNA vaccines of different HPV genotypes are spatially separated upon administration, or ameliorated if the cognate L2 proteins are co-expressed.

## Materials and Methods

### Ethics Statement

This study was carried out in strict accordance with the recommendations in the Guide for the Care and Use of Laboratory Animals of the National Institutes of Health. All animal studies were performed with the prior approval of the Animal Care and Use Committee of Johns Hopkins University (protocol MO08M19).

### Vaccine Preparation

Codon optimized capsid genes, L1 and L2, of HPV6, HPV16, HPV18, HPV26, and HPV51 were sub-cloned into double expression vector, pVITRO1-neo-mcs (Invivogen, San Diego CA) or pcDNA (Invitrogen, Carlsbad CA), for DNA vaccination. HPV16 L2 multimer expression construct encompassing residues 11–88 of 8 HPV types (L2×8) was sub-cloned into pcDNA 3.1 for mammalian expression, and L2  $\alpha$ 11–88×8 polypeptide was produced, purified, and dialyzed as previously described [49]. All plasmids employed for the immunization were purified and endotoxins were removed with UltraClean® endotoxin free kit (Mo Bio, Carlsbad CA).

### Pseudovirus (PsV) Production

Codon optimized L1 and L2 capsid genes of HPV6, 11, 16, 18, 26, 31, 45, 51, were sub-cloned into double expression vector, pVITRO1-neo-mcs (Invivogen, San Diego CA). Pseudovirions (PsVs) were generated in 293TT cells following the standard PsV production protocol (<http://home.ccr.cancer.gov/Lco/pseudovirusproduction.htm>). Firefly luciferase expression plasmid was employed as a reporter for PsV infection in neutralization assays and for vaginal challenge studies.

### Immunoprecipitation

293TT cells grown in DMEM-10 medium were transfected with empty vector, a single expression vector for only HPV6, 16, or 18 L1, or mixture of L1 DNA of HPV6, 16, 18 in equal parts using transit 2020 (Mirus Bio LLC, Madison WI), and harvested in 48 hours. Cells were lysed with non-denaturing lysis buffer containing 20 mM Tris HCl pH 8, 137 mM NaCl, 10% (*v/v*) glycerol, 1% (*v/v*) Nonidet P-40, 2 mM EDTA, and a protease inhibitor cocktail (Roche). mAb H18.F8 [9] was added to whole cell lysate (0.5 mg) and tumbled end-over-end overnight at 4°C. Protein G Sepharose (GE healthcare, Waukesha WI) was added and mixed for an additional 4 hours at 4°C. Resins were harvested by centrifugation at 14,000×g at 4°C for 1 min and supernatants were discarded. Resins were washed three times with 1 ml lysis buffer, resuspended in 2× sample loading buffer, and boiled for 5 min.

## Western blot analysis

Western blotting was performed with standard protocols (<http://www.abcam.com/ps/pdf/protocols/WB-beginner.pdf>). Primary antibodies used were H6.C6, H16.O7, and H18.E20 [9], and secondary antibody used was HRP-goat anti-mouse IgG light chain (Jackson ImmunoResearch, West Grove PA).

## Vaccination

Groups ( $n=5$ ) of 3–4 week old female Balb/c mice were vaccinated s.c. three times at two week intervals with 25  $\mu\text{g}$  of L2 $\times$ 8 multimer polypeptide formulated with alum (50  $\mu\text{g}$ ), or 50  $\mu\text{l}$  of Gardasil, or i.m. with 10  $\mu\text{g}$  of L2 11–88 $\times$ 8 multimer expression plasmid, or i.m. utilizing *in vivo* electroporation with PBS, 10  $\mu\text{g}$  of L2 $\times$ 8 multimer expression plasmid in pcDNA 3.1, 2  $\mu\text{g}$  or 10  $\mu\text{g}$  of HPV6, 16, 18, 26, 51 L1 expression plasmid in pVITRO1-neo-mcs, 20  $\mu\text{g}$  of HPV6, 16, 18 L1 expression plasmid in pVITRO1-neo-mcs, 10  $\mu\text{g}$  of HPV11, 16, 18, 26, 31, 45, 51 L1+L2 expression plasmid in pVITRO1-neo-mcs, 20  $\mu\text{g}$  of HPV6, 16, 18 L1+L2 expression plasmid in pVITRO1-neo-mcs, 10  $\mu\text{g}$  of mixed (HPV 6, 16, 18, 26, 51 L1, 2  $\mu\text{g}$  each) plasmids in pVITRO1-neo-mcs, 60  $\mu\text{g}$  of mixed (HPV6, 16, 18 L1, 20  $\mu\text{g}$  each) plasmids in pVITRO1-neo-mcs, 60  $\mu\text{g}$  of mixed (HPV6, 16, 18 L1+L2, 20  $\mu\text{g}$  each) plasmids in pVITRO1-neo-mcs, or 20  $\mu\text{g}$  of HPV6, 16, 18 L1 expression plasmids in pVITRO1-neo-mcs at different sites. Blood samples were collected two weeks and three months after the last vaccination. Serum was separated by centrifugation at 2,000  $g$  for 10 min at 4°C after the blood had congealed overnight at room temperature.

## Electroporation

Mice were injected with DNA in 30  $\mu\text{l}$  water i.m. into the gastrocnemius muscle, or biceps femoris muscle of hind leg. A pair of electrode needles was inserted into the muscle flanking injection site and electrical pulses were delivered utilizing an ECM830 electroporation generator (BTX Harvard Apparatus company, Holliston MA). Eight pulses of 106 V each were delivered for 20 ms pulse duration at 200 ms intervals.

## ELISA

For analysis of antibody response against HPV16 L2 protein, microtiter plates were coated with L2 protein at 500 ng in 100  $\mu\text{l}$  PBS/well overnight at 4°C, and blocked with PBS/1% BSA for 1 hour at 37°C. Plates were incubated with serum samples diluted 1:50 in PBS/1% BSA for 1 hour at 37°C. After 3 washes with washing buffer (0.01% *v/v* Tween 20 in PBS), HRP-sheep anti-mouse IgG diluted in 1% *w/v* BSA at 5000-fold was added to each well as a secondary antibody, and incubated for 1 hour at 37°C. After 3 further washes, 100  $\mu\text{l}$  of ABTS solution, 2,2'-Azinobis [3-ethylbenzothiazoline-6-sulfonic acid], Roche, (Basel Switzerland) was added to each well for developing color and read by an ELISA reader, Benchmark Plus (Bio Rad, Hercules CA) at 405 nm.

## In vitro Neutralization Assays

Serum samples (4  $\mu\text{l}$ ) were serially diluted two-fold in culture media, and mixed with 0.03  $\mu\text{l}$  of HPV PsV carrying luciferase reporter plasmid. Mixtures were incubated at 37°C for two hours, added to  $3\times 10^4$  of 293TT cells, and incubated at 37°C for 72 hours. Cells were washed with 1 $\times$  PBS, lysed with 30  $\mu\text{l}$  of Cell Culture Lysis Reagent (Promega, Madison WI) for 15 min at room temperature on a rocking platform. Lysates were transferred to 96-Well black plate, and luciferase activity was measured by GloMax<sup>®</sup>-Multi Detection System (Promega, Madison WI) after

adding 50  $\mu\text{l}$  of luciferin substrate (Promega, Madison WI) to each well.

## Vaginal Challenge Studies

Mice were subcutaneously injected with 3 mg of medroxyprogesterone (Depo-Provera, Pfizer, New York NY) four days before vaginal challenge to synchronize their estrus cycles. Viral challenge was performed by delivery of 10  $\mu\text{l}$  of HPV PsV (HPV6: 135 billion, HPV16: 189 billion particles in total) mixed with 10  $\mu\text{l}$  of 3% carboxymethyl cellulose (CMC) into the vagina before and after cytobrush treatment (15 rotations, alternating directions) while the mice were under isoflurane anesthesia. Three days after challenge, mice were anesthetized by isoflurane, and 20  $\mu\text{l}$  of luciferin substrate (7.8 mg/ml, Promega, Madison WI) was delivered into the vaginal vault before imaging. Bioluminescence was acquired for 10 min with a Xenogen IVIS 100 (Caliper Life Sciences, Hopkinton MA) imager, and analysis was accomplished with Living Image 2.0 software. For imaging of passively immunized mouse groups, mice were injected i.v. with 20  $\mu\text{l}$  of serum one day before vaginal challenge.

## Statistical analysis

Exploratory statistical analyses are performed to analyze the observed titer data. Square-root data transformations were used to achieve normality in residuals for titer data. One-way ANOVA and pair wise multiple comparisons with Bonferroni adjustment were performed using SAS 9.3. When the overall significance test is not significant, the pair wise comparisons are not conducted. To claim significance, we use alpha level 0.1 for pair wise comparisons. The homogeneity of variances is examined with Levene's test.

## Results

### In vivo electroporation with HPV L1 DNA vaccines elicits robust type-restricted neutralizing antibody titers in mice

Vaccination of rabbits with naked DNA expressing CRPV L1 either via i.m. injection or ballistic delivery on gold beads (gene gun) protects rabbits from experimental viral challenge [50,51]. The initial enthusiasm for naked DNA vaccination based on animal data has been tempered by a low efficiency of delivery by *i.m.* injection of patients. However, recent clinical studies suggest that *in vivo* electroporation of naked DNA vaccines can induce robust humoral responses in patients [47,48,52,53,54]. Furthermore, codon optimization appears to be important for robust expression of the HPV capsid proteins [55,56,57]. Therefore we sought to determine whether a strong neutralizing antibody response could be elicited in mice with codon optimized HPV16 L1 capsid gene-expressing naked DNA constructs utilizing *i.m.* injection as compared to *i.m.* injection with *in vivo* electroporation, or *i.d.* delivery via gene gun. We utilized HPV pseudovirion infection of 293TT cells to examine neutralization by serum antibody as a surrogate of wart-derived virions infecting primary human keratinocytes [58]. Vaccination of mice three times at 2 week intervals with 40  $\mu\text{g}$  of HPV16 L1 DNA by *i.m.* injection resulted in a weak HPV16 neutralizing antibody response as compared to s.c. administration of 1/10<sup>th</sup> of a human dose of Gardasil for which the serum titer was 2 log<sub>10</sub> greater (Figure 1A). The response was greater when this HPV16 L1 DNA vaccine was administered *i.d.* via gene gun at a dose of 2  $\mu\text{g}$  (the maximum that can be applied by this method), but the titer was still a log<sub>10</sub> below that obtained with Gardasil. When the HPV16 L1 DNA vaccine was injected *i.m.* followed by *in vivo* electroporation, doses of 10  $\mu\text{g}$  or greater elicited an HPV16 neutralizing antibody titer

approaching that of Gardasil, whereas the response to the 2 µg dose was weak. A one-way analysis of variance (ANOVA) shows that there is significant difference among 2 µg, 10 µg, 20 µg and 40 µg HPV16 L1 electroporation (EP) groups (p-value = 0.0347). With Bonferroni multiple comparison adjustment, at α level 0.1, we find a significant difference between 2 µg and 10 µg HPV 16 L1-EP groups (adjusted p-value 0.0991) and between 2 µg and 40 µg HPV 16 L1-EP groups (adjusted p-value = 0.0582). A significant difference is also detected between 2 µg HPV16 L1-GG and 40 µg HPV 16 L1-EP groups (p-value = 0.0031).

**In vivo electroporation with L1 only or L1+L2 DNA vaccines elicits a similar antibody response**

The co-expression of the minor capsid protein L2 with L1 can enhance the efficiency of VLP assembly [59]. Therefore, we explored whether a higher titer antibody response could be achieved upon vaccination with a DNA vaccine expressing both L1 and L2 versus L1 alone. However, vaccination three times i.m. using in vivo electroporation with 10 µg of a DNA vaccine expressing HPV16 L1+L2 elicited a similar neutralizing antibody titer to HPV16 L1 alone. Further, vaccination three times i.m. using in vivo electroporation to deliver 10 µg of a DNA vaccine expressing L1+L2 derived from HPV11, HPV18, HPV26, HPV31, HPV45 or HPV51 each elicited a similar neutralizing antibody titer against PsV of the same type utilized for vaccination (Figure 1B). The titers of neutralizing antibodies induced upon vaccination three times i.m. using in vivo electroporation to deliver 10 µg of a DNA vaccine expressing L1+L2 were similar to, but still lower than those elicited by Gardasil. Since the responses to electroporation of 10 µg of a DNA vaccine expressing L1+L2 appeared more variable than for Gardasil, the homogeneity of variances among L1 DNA EP, L2×8 Protein and Gardasil groups was examined with Levene’s test. While the difference is not significant (p-value = 0.0556), this may reflect the rather limited sample size (5 mice in each group).

L2 contains cross-neutralizing epitopes, and therefore we tested whether in vivo electroporation of mice with 10 µg of the DNA vaccine expressing HPV16 L1+L2 induced antibodies that cross-neutralized PsV of HPV31, the genotype most closely related to

HPV16, or *vice versa*. However, no significant cross-neutralization was observed between these two types (Figure 1B), and no L2-specific antibody response was observed (despite robust L2 expression, Figure 2C) indicating that L2 is not immunogenic in the context of the capsid. These findings suggest that a multivalent L1-based DNA vaccine approach or vaccination with L2 (in the absence of L1) would be necessary to generate a broadly protective response.

**In vivo electroporation with an L2 multimer DNA vaccine failed to elicit neutralizing antibodies**

Prior studies by Hitzeroth *et al* suggest that i.m. vaccination of mice with 100 µg DNA expressing codon-optimized full length HPV16 L2 induces a T cell response but only a very weak antibody titer, whereas vaccination with the amino terminus of L2 may be more immunogenic [60,61]. Vaccination of mice with a multimer peptide comprising L2 residues 11–88 amino acids derived from 8 HPV types (L2×8) induced broadly neutralizing antibodies, although at a titer ~30-fold lower than for L1 VLP [49]. Therefore we compared the HPV16 neutralizing antibody titers induced upon vaccination via *in vivo* electroporation with codon-optimized HPV16 L1 DNA versus L2×8 multimer DNA. While the L1 DNA construct elicited very high neutralization titers approaching those induced by Gardasil vaccination (Figure 2A), L2×8 multimer DNA vaccination failed to induce neutralizing antibody against HPV16 pseudovirions, even with a single L2×8 protein in alum boost (although the latter did induce an L2-specific response detectable by ELISA with a titer of 400). Vaccination with L2×8 multimer DNA failed to induce a neutralizing antibody response either with or without electroporation, and whether the codon optimization of the L2×8 construct was biased for bacterial expression or mammalian expression (not shown). Similar levels of expression of L2×8 protein were detected in 293TT cells 48 h post transfection with the L2×8 constructs codon optimized for bacterial or mammalian cell expression (Figure 2C). The levels of L2×8 were substantially lower than for full length codon-optimized HPV16 L2 and there was evidence of a greater extent of degradation, possibly contributing to the poor immune response (Figure 2C).

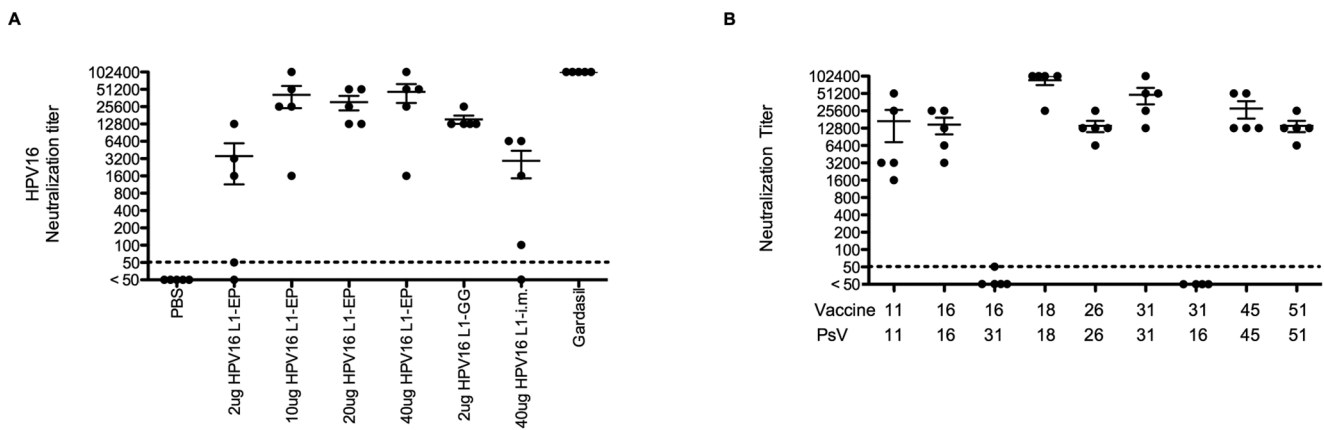

**Figure 1. Impact of DNA vaccine dose and delivery method on the induction of type-restricted neutralizing antibodies.** (A) Balb/c mice were vaccinated three times at two week intervals with HPV16 L1 DNA expression vector via i.m. injection alone (40 µg)(i.m.), i.m. injection and *in vivo* electroporation (0, 2, 10, 20 or 40 µg)(EP) or i.d. ballistic delivery on gold particle via gene gun (2 µg)(GG). Vaccination with Gardasil s.c. was included as a positive control. Serum samples were collected two weeks after the third vaccination, and tested for in vitro neutralization assay against HPV16. (B) Mice were vaccinated with DNA vector expressing L1+L2 of the genotypes indicated (see line labeled 'Vaccine') i.m. utilizing electroporation. Neutralizing antibody titer against PsV of the indicated genotypes (see line labeled 'PsV') was measured for sera harvested two weeks after the last vaccination. doi:10.1371/journal.pone.0060507.g001

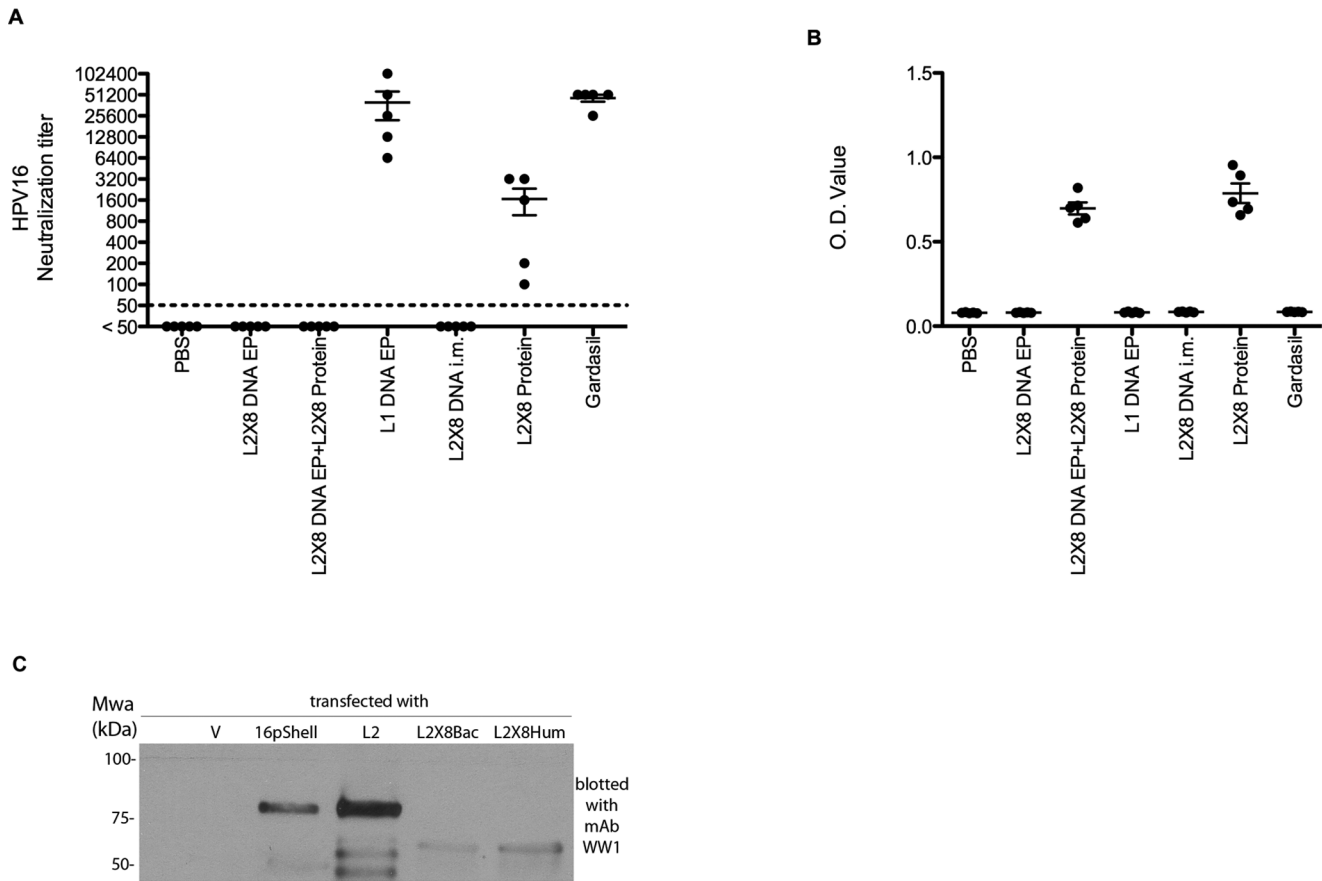

**Figure 2. Neutralizing antibody titer and antibody response of sera from mice vaccinated with L1 or L2x8 delivered as protein or a DNA vaccine via electroporation.** Balb/c mice were vaccinated three times at two week intervals with PBS, 10 µg L2x8 DNA vaccine i.m. with electroporation three times, or twice utilizing 10 µg HPV16 L1 DNA vaccine i.m. with electroporation followed by a single boost with 25 µg L2x8 protein in alum s.c., 10 µg HPV16 L1 DNA vaccine i.m. with electroporation three times, three times with 10 µg L2x8 DNA vaccine i.m., or 25 µg L2x8 protein in alum s.c., or Gardasil s.c.,. Serum samples were collected two weeks after the third vaccination, and were tested for in vitro HPV16 neutralization titer (A) and antibody response to HPV16 L2 (B) as measured by ELISA. (C) To assess relative levels of expression, 293TT cells were transfected with no plasmid, HPV16 L1+L2 DNA in pShell, full length HPV16 L2 DNA in p16L2h, bacterial codon optimized L2x8 DNA in pcDNA, or human codon optimized L2x8 in pcDNA. 293TT cells were lysed two days after transfection. Western blotting was performed with lysate samples using a monoclonal antibody to HPV16 L2 17–36. doi:10.1371/journal.pone.0060507.g002

Vaccination with antigen delivered first via DNA vaccine and then boosting with protein has been suggested to enhance humoral immunity as compared to DNA vaccination or protein alone [62,63]. We tested the sera of mice vaccinated twice with L2x8 multimer DNA followed by a third immunization of L2x8 multimer peptide mixed with alum adjuvant. Surprisingly, we were not able to detect an HPV16 neutralizing antibody titer with the L2x8 multimer DNA vaccine prime and protein boost combination regimen (Figure 2A), although antibody response to full length HPV16 L2 was detected (Figure 2B) with an ELISA titer of 400. In contrast, vaccination three times with L2x8 protein in alum elicited L2-specific antibody (ELISA titer of 12,800) and significant titers of HPV16 neutralizing antibody (a mean titer of 1600, Figure 2A), although the latter is ~30-fold lower than for L1 DNA vaccination or Gardasil. This suggests that even vaccination twice with L2x8 multimer DNA was inadequate for priming a neutralizing antibody response prior to a single L2x8 protein boost, and this may reflect poor expression, protein instability, insensitivity of the neutralization assay, weak immunogenicity for L2x8 vaccination via DNA vector, and/or the preferential

induction of antibody to non-neutralizing L2 epitopes when using this immunization regimen.

### Vaccination with a mixture of L1 DNAs of multiple HPV types exhibits interference

Since L1-based DNA vaccine electroporation successfully induced a robust but type-restricted neutralizing antibody response, we evaluated the potential for a multivalent vaccine in which L1 DNAs of several HPV types are mixed prior to i.m. injection and *in vivo* electroporation. Our initial study suggested that a 2 µg dose of HPV16 L1 DNA vaccine induces a suboptimal neutralizing antibody response, but 10 µg produces the maximal response. To examine if the 2 µg L1 DNA vaccine dose provided a consistent response regardless of HPV type, and whether the response to a pentavalent vaccine would be additive or synergistic, we performed a pilot experiment in which five different DNA vaccines expressing L1 of HPV6, HPV16, HPV18, HPV26, and HPV51 respectively were mixed (2 µg each) and delivered i.m. by electroporation for comparison to vaccination with each type singly at doses of 2 µg or 10 µg. HPV6, HPV16 and HPV18 are each members of different papillomavirus species (α10, α9, and α7

respectively), whereas HPV26 and HPV51 are both members of the  $\alpha 5$  species. The latter two types were included to determine if interference in the response to mixtures of L1 expression constructs occurred intra-species or inter-species or both [64]. After three immunizations, mice vaccinated with the pentavalent L1 DNA mixture exhibited distinct neutralizing antibody responses compared to mice vaccinated with L1 DNA of single HPV type (Table 1). The 2  $\mu\text{g}$  dose of a single L1 DNA vaccine gave an inconsistent response for HPV16 and between different HPV types, whereas the response to 10  $\mu\text{g}$  was consistent across all 5 types tested. The variable response at the 2  $\mu\text{g}$  dose of a single L1 DNA vaccine did not reflect L1 expression level alone. Indeed, the relative number of particles produced using these codon-optimized L1 genes to produce pseudovirions in 293TT cells, as estimated by Coomassie-stained SDS-PAGE gel studies of purified pseudovirions and normalized to HPV16 are: HPV6 L1: 15.5%, HPV16 L1: 100%, HPV18 L1: 1%, HPV26 L1: 119%, HPV51 L1: 147%. Thus despite significantly lower production of particles by HPV6 and HPV18, both of these constructs elicit a robust neutralizing antibody response. Serum from the L1 DNA mixture group showed no detectable neutralizing titer against HPV6 and HPV16 PsVs, the expected titer for HPV51 but an increased titer against HPV18 and HPV26 PsVs (Table 1). This finding suggested that the DNA constructs may not act independently when mixed together and that increasing the dose of L1 DNA vaccine from 2  $\mu\text{g}$  to 10  $\mu\text{g}$  improves the level and consistency of the neutralizing antibody response.

**Spatial separation of L1 DNA vaccines of different types, but not L2 co-expression, fully restores independent neutralizing antibody responses upon multi-type vaccination**

In a follow-up study (Figure 3), several changes were made in order to address interference when L1 DNA vaccines are mixed. First, the dose of each L1 DNA was increased from 2  $\mu\text{g}$  to 20  $\mu\text{g}$  to enhance the level and consistency of the neutralizing antibody response, and the number of HPV types decreased from five to three (HPV6, HPV16 and HPV18) to minimize the potential for

interference and because vaccination with Gardasil suggests limited or no immunologic interference in the antibody responses to L1 VLPs these three types (Table 1). Furthermore, these types are the most common causing genital warts (HPV6) and squamous cell (HPV16) and adenocarcinoma (HPV18) of the uterine cervix, suggesting their likely inclusion in future vaccines as compared with HPV26 and HPV51 that are infrequently found in cervical cancer [65]. It is possible that the immunologic interactions between the L1 vaccines when administered as a mixture reflect heterotypic binding and inappropriate co-assembly and/or immunologic dominance of particular construct(s). Therefore, to prevent co-assembly of L1 of different types into a chimeric VLP, we tested the impact on the humoral response of administering the three L1 DNA constructs each at a different site (HPV6 L1 DNA was injected into the left biceps femoris muscle, HPV16 L1 DNA was injected into the right gastrocnemius muscle, and HPV18 L1 DNA was injected into the left gastrocnemius muscle) versus mixed together and delivered at the same site. In addition, L2 exhibits some type-restriction for interaction with L1 [66,67,68], and facilitates VLP assembly by  $\sim 4$ -fold [69]. Therefore, mice were vaccinated with a mixture of three DNA vaccines expressing L1+L2 of HPV6, HPV16 and HPV18 based upon the hypothesis that the presence of the cognate L2 would both increase the assembly of VLPs four-fold and the specificity of co-assembly with the homotypic L1, thus limiting heterotypic VLP production. Two weeks after three vaccinations i.m. with the DNA constructs indicated, the *in vitro* neutralization titer of the serum of each mouse was tested against HPV6, HPV16 and HPV18 PsV. Vaccination with 20  $\mu\text{g}$  of each L1 DNA vaccine individually induced a robust homotypic neutralizing antibody response and an equivalent titer was observed when utilizing DNA vaccines expressing L1+L2 (Figure 3A–C) as the Bonferroni adjusted pair wise comparisons are not significant in all cases at alpha level 0.1. Despite reducing the number of HPV L1 DNAs to three types, (HPV6, HPV16, and HPV18), there was still some interference in production of neutralizing antibody, most noticeably for HPV16 (Figure 3B) for which ANOVA analysis results show that there is significant difference among groups (p-value = 0.0030), to a lesser extent for HPV18 (Figure 3C) (p-value = 0.0243), but not

**Table 1.** Neutralizing antibody titers induced upon vaccination of mice with a pentavalent HPV L1 DNA vaccine.

| Vaccine                  | Dose ( $\mu\text{g}$ ) | HPV6 IVNT | HPV16 IVNT | HPV18 IVNT | HPV26 IVNT | HPV51 IVNT |
|--------------------------|------------------------|-----------|------------|------------|------------|------------|
| vector                   | 10                     | ND        | ND         | ND         | ND         | ND         |
| HPV6 L1                  | 2                      | ND        |            |            |            |            |
|                          | 10                     | 6,400     |            |            |            |            |
| HPV16 L1                 | 2                      |           | ND         |            |            |            |
|                          | 10                     |           | 6,400      |            |            |            |
| HPV18 L1                 | 2                      |           |            | 50         |            |            |
|                          | 10                     |           |            | 51,200     |            |            |
| HPV26 L1                 | 2                      |           |            |            | 1,600      |            |
|                          | 10                     |           |            |            | 6,400      |            |
| HPV51 L1                 | 2                      |           |            |            |            | 50         |
|                          | 10                     |           |            |            |            | 12,800     |
| HPV6,16,18,26, and 51 L1 | 2,2,2,2,2              | ND        | ND         | 6,400      | 6,400      | 50         |
| Gardasil                 | 0.1 mL                 | 102,400   | 102,400    | 102,400    | ND         | ND         |

Balb/c mice were vaccinated i.m. three times at two week intervals with a mixture of L1 vectors of HPV6, HPV16, HPV18, HPV26, and HPV51 (2  $\mu\text{g}$  each), L1 vector of single HPV type (2  $\mu\text{g}$  or 10  $\mu\text{g}$ ) utilizing electroporation. Gardasil vaccination was included as a positive control. Sera from 5 mice were pooled together, and *in vitro* neutralizing antibody titer (IVNT) was measured with HPV6, HPV16, HPV18, HPV26, and HPV51 PsVs. ND: Not detected at 1:50.

doi:10.1371/journal.pone.0060507.t001

significantly for HPV6 (Figure 3A) ( $p$ -value = 0.5577). As seen in figure 3A, the HPV16 neutralizing serum antibody titer induced by vaccination with HPV16 L1 alone was significantly higher than when the HPV6, HPV16 and HPV18 L1 constructs were mixed together and injected at the same site (the Bonferroni adjusted  $t$ -test  $p = 0.0038$ ), but not when given at different sites ( $p = 0.6893$ ) or when L2 was co-expressed in the constructs ( $p = 0.7567$ ). This pattern was also observed for sera harvested 3 months post vaccination (Figures 3D-F) as ANOVA analysis results show that there is again significant difference among groups for HPV16 (Figure 3E,  $p$ -value = 0.0005), and HPV18 (Figure 3F,  $p$ -value = 0.0027), but not for HPV6 (Figure 3D,  $p$ -value = 0.6497). Specifically, in figure 3E, the HPV16 neutralizing serum antibody titer induced 3 months after vaccination with HPV16 L1 alone was significantly higher than when the HPV6, HPV16 and HPV18 L1 constructs were mixed together and injected at the same site (the Bonferroni adjusted  $t$ -test  $p = 0.0394$ ), but not when given at different sites or when L2 was co-expressed in the constructs. Importantly, when the three L1 DNA vaccines were each administered at a physically separate site, robust homotypic neutralizing antibody titers were observed, consistent with those obtained when administering each construct alone for all three virus types. This observation suggests that the interference does not reflect immunologic competition, but rather suggests that co-expression of L1 of HPV6, HPV16 and HPV18 in the same cells might result in aberrant VLP assembly as a consequence of heterotypic binding. While vaccination at different sites resolved interference completely, electroporation of mice with a mixture of three DNA vaccines co-expressing both L1 and L2 of HPV6, HPV16 and HPV18 only partially reduced interference in the responses to HPV16 and HPV18 (Figure 3B and C). This phenomenon was preserved when analyzing sera harvested at 3 months after the final vaccination (Figures 3D-F). We also tested whether vaccination with L1+L2 DNA of a single type or a mixture of three types can generate an L2-specific antibody response but no consistent antibody response against HPV16 L2 was observed (Figure 3G). These results imply that formation of chimeric VLP still occurs when the valency of the L1 multitype vaccination is reduced, and this problem can be ameliorated by co-expression of the cognate L2 proteins, but is eliminated by vaccinating at different sites.

### Electroporation of L1 DNA vaccines induces type-restricted protective antibody responses

As the titers of neutralizing antibodies induced upon vaccination three times i.m. using *in vivo* electroporation to deliver 20  $\mu$ g of an L1 DNA vaccine were similar to, but still lower than those elicited by Gardasil, we therefore tested whether they are still sufficient to protect against vaginal challenge with the homologous type HPV. Although HPV does not produce disease in mice, the host restriction in HPV infection is determined after delivery of the viral genome to the nucleus, and thus infection of the vaginal tract of mice with HPV pseudovirions carrying a luciferase reporter can be detected by imaging bioluminescence [70]. Passive transfer of 20  $\mu$ l of serum from mice vaccinated i.m. three times with *in vivo* electroporation to deliver 20  $\mu$ g of DNA vaccine expressing either L1 only or L1+L2 completely protected naïve mice from experimental vaginal challenge with the homologous genotype (Figure 4A). This was also shown for HPV6 (Figure 4B), and the protection was maintained when using sera harvested at 3 months post vaccination for the passive transfer study (Figure 4C). Thus the data suggest that the neutralizing antibody titers induced by *in vivo* electroporation with an L1 DNA vaccine, although lower than

for Gardasil, are sufficient for complete protection against vaginal challenge by the vaccine type.

### L2 co-expression is sufficient to restore protection using multivalent L1-based DNA vaccination

The host restriction in HPV infection is determined after delivery of the viral genome to the nucleus, and thus infection of the vaginal tract of mice with HPV pseudovirions carrying a reporter gene such as luciferase whose expression can be detected by imaging bioluminescence [70]. This provides a useful model to examine *in vivo* protection of naïve mice after passive transfer of neutralizing antibodies [71,72]. Passive transfer of 20  $\mu$ l of serum of mice electroporated i.m. with a mixture of three DNA vaccines expressing L1 of HPV6, HPV16, and HPV18 provided complete protection against intra-vaginal challenge with HPV6 PsV (Figure 4B). In contrast, when 20  $\mu$ l of serum of mice electroporated i.m. with a mixture of three DNA vaccines expressing L1 of HPV6, HPV16, and HPV18 was injected into naïve mice, significantly weaker protection against intra-vaginal challenge with HPV16 PsV was observed (Figure 4A). Interestingly, the sera from mice that were electroporated i.m. with a mixture of three DNA vaccines expressing both L1 and L2 of HPV6, HPV16, and HPV18, were completely protective by passive transfer. This finding suggests that although the co-expression of L2 does not completely recover the humoral response obtained by vaccination with a single L1 DNA vaccine, nevertheless the titers induced are sufficient for complete protection upon passive transfer of 20  $\mu$ l of serum (which corresponds to  $\sim$ 1:50 dilution in the mouse). As expected, passive transfer of sera from mice electroporated i.m. at different sites with the three DNA vaccines expressing L1 of HPV6, HPV16, and HPV18, were also completely protective against HPV16 challenge. Importantly, these phenomena were consistent when testing for protective capacity against vaginal HPV16 challenge of naïve mice after passive transfer of 20  $\mu$ l of sera obtained three months after active vaccination (Figure 4C). These data suggest that the protective responses elicited by multivalent vaccination are durable if the L1 DNA vaccines expressing individual types are injected in different locations or L2 is co-expressed with each L1.

### Immunologic interference is associated with heterotypic interactions between L1 proteins

The reduction in neutralizing responses observed when the DNA vaccines expressing L1 of different types are injected into the same site but not different sites suggests that it is direct interaction between L1 of different types rather than immunologic competition that is responsible for this interference. It has been previously described that HPV6 and HPV16 L1 subunits co-assemble together generating hybrid VLPs in yeast [73] and co-expression of either HPV11 or BPV1 L1 with HPV16 L1 reduces the assembly of HPV16 L1 VLPs [74]. In addition, it is known that neutralizing epitopes on VLPs are conformationally-dependent and type-restricted [75,76,77]. Therefore, to test for direct interaction between L1 of different HPV types, 293TT cells were transfected with the three DNA vaccines expressing L1 of HPV6, HPV16, and HPV18 either individually or simultaneously, and immunoprecipitation experiments were performed on cell lysates using the H18.F8 monoclonal antibody that recognizes a conformational and type-specific HPV18 L1 epitope [78]. The presence of HPV6 L1, HPV16 L1 and HPV18 L1 in the immunoprecipitates was detected by Western blot analysis with type-restricted monoclonal antibodies H6.C6, H16.O7 and H18.E20 [78], respectively (Figure 5). H18.F8 immunoprecipitat-

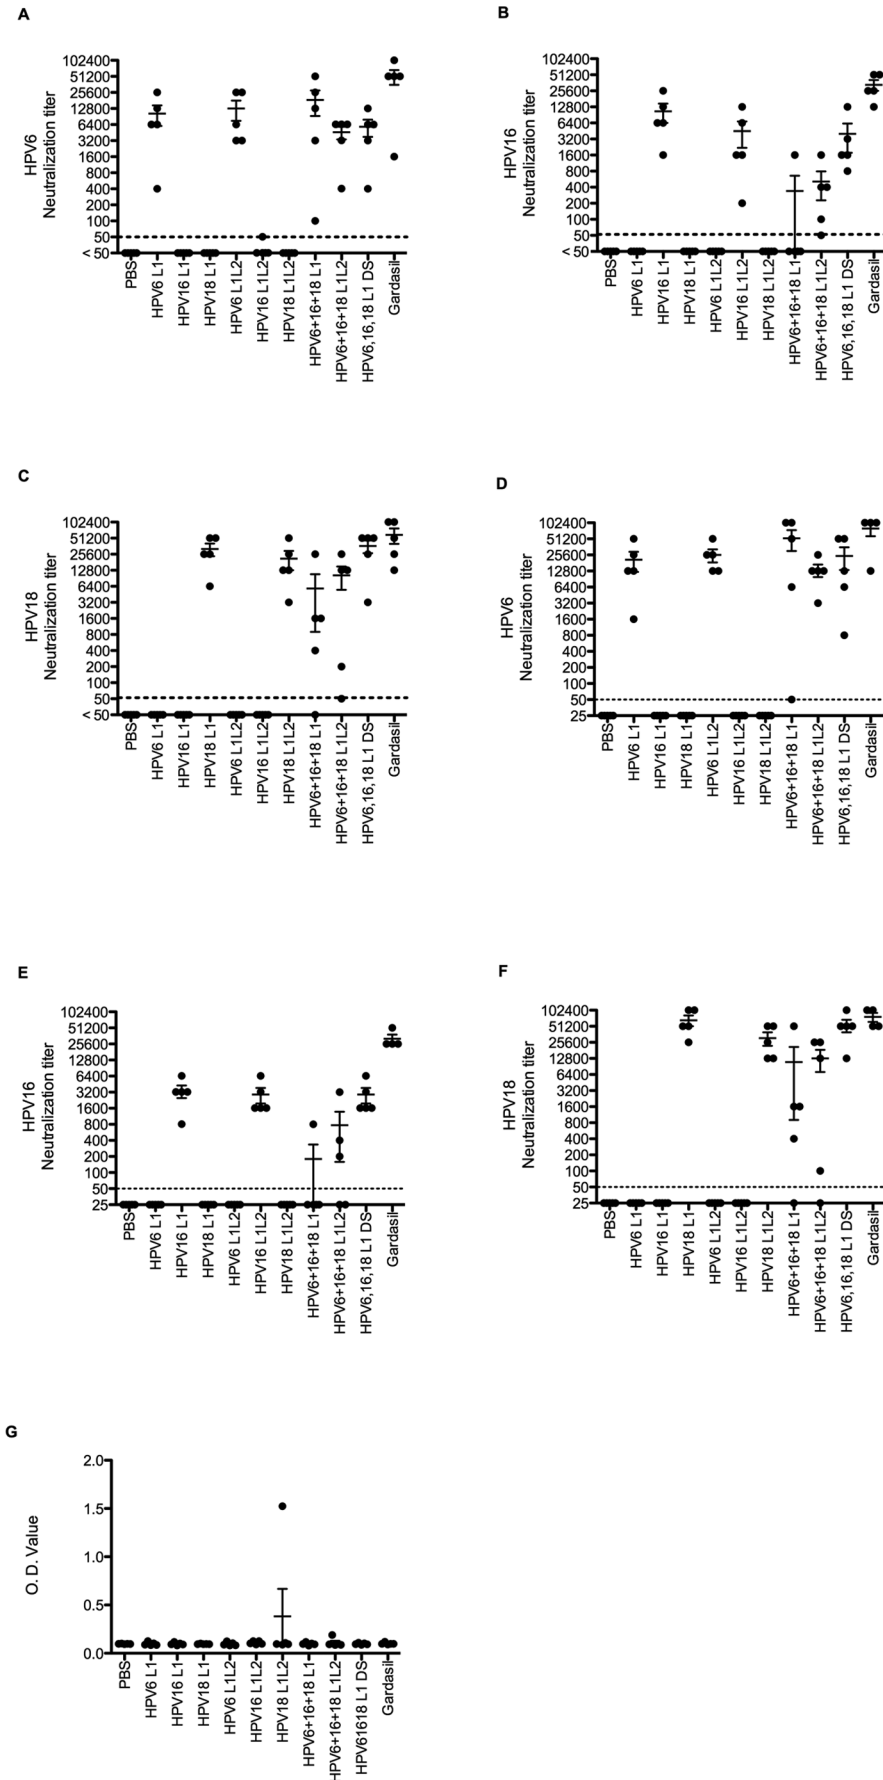



**Figure 3. A comparison of antibody responses of mice vaccinated with DNA expressing L1 or L1+L2 of HPV6, 16, or 18, either singly or together at the same or different sites.** Balb/c mice were vaccinated i.m. with electroporation three times at two week intervals with 20 µg each of DNA expressing L1 or L1+L2 of HPV6, HPV16, and HPV18, either individually, or together at the same site or each at a different site (DS), or s.c. with Gardasil. Serum samples were harvested at two weeks after the third vaccination (A–C) or 3 months after the third vaccination (D–F), and neutralizing antibody titers were measured with HPV6 (A,D), HPV16 (B,E), or HPV18 PsV (C,F). Antibody response to L2 was measured by ELISA against full length HPV16 L2 with serum samples collected two weeks after the third vaccination (G). doi:10.1371/journal.pone.0060507.g003

ed HPV18 L1, but not HPV6 L1 or HPV16 L1 from lysates of cells transfected with only a single L1 DNA vaccine (Figure 5). By contrast, H18.F8 immunoprecipitated HPV6 L1, HPV16 L1 and HPV18 L1 from the lysates of cells co-transfected with the three DNA vaccines expressing L1 of HPV6, HPV16, and HPV18 L1. These results demonstrate that HPV18 L1 can bind to both HPV6 L1 and HPV16 L1.

**Discussion**

L1 DNA vaccines have potential as an alternative prophylactic HPV vaccine that is simple and inexpensive to produce and heat stable, properties that would facilitate widespread immunization in low resource and remote settings. However, delivery of DNA vaccines *in vivo* has been limited by the efficiency of transfection *in vivo*. Several approaches including ballistic delivery via gene gun, *in vivo* electroporation devices, and tattooing have been developed to improve *in vivo* delivery. Here, we have tested two of these

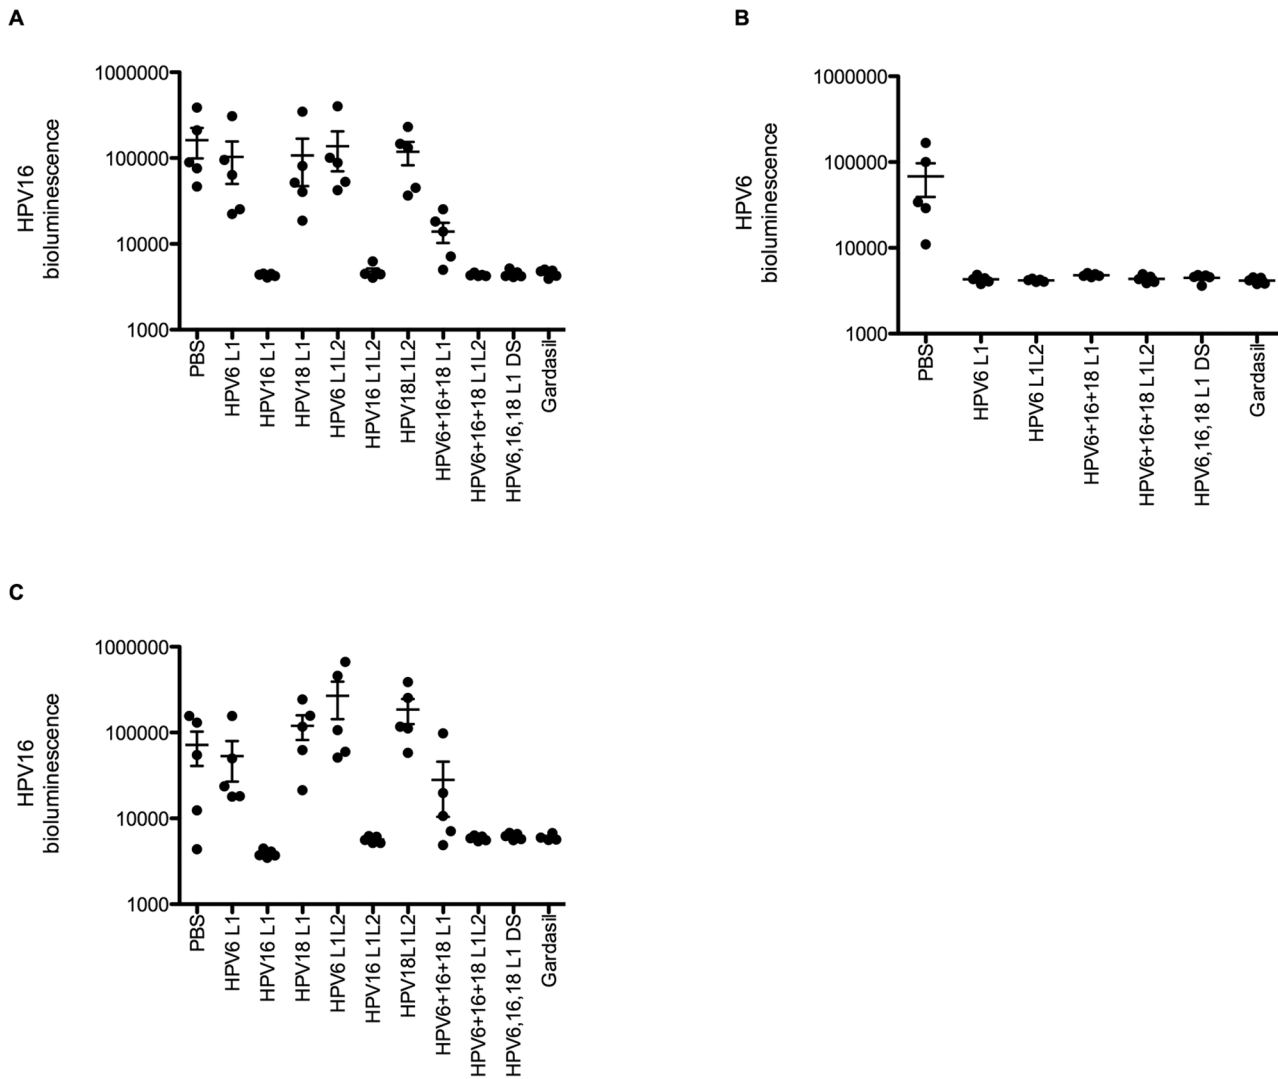

**Figure 4. Comparison of protective antibody responses.** Balb/c mice were vaccinated i.m. with electroporation three times at two week intervals with 20 µg each of DNA expressing L1 or L1+L2 of HPV6, HPV16, and HPV18, either individually, or together at the same site or each at a different site, or s.c. with Gardasil. Serum samples were collected two weeks (A,B) and three months (C) after the last vaccination to test their protective efficacy *in vivo* and *in vitro*. Naïve Balb/c mice (5 per group) were passively immunized i.v. with 20 µl of pooled serum. Mice were challenged intra-vaginally with HPV16 (A,C) or HPV6 (B) PsV carrying a luciferase reporter construct. Three days later, luciferin was administered intra vaginally, and bioluminescence imaging was performed. doi:10.1371/journal.pone.0060507.g004

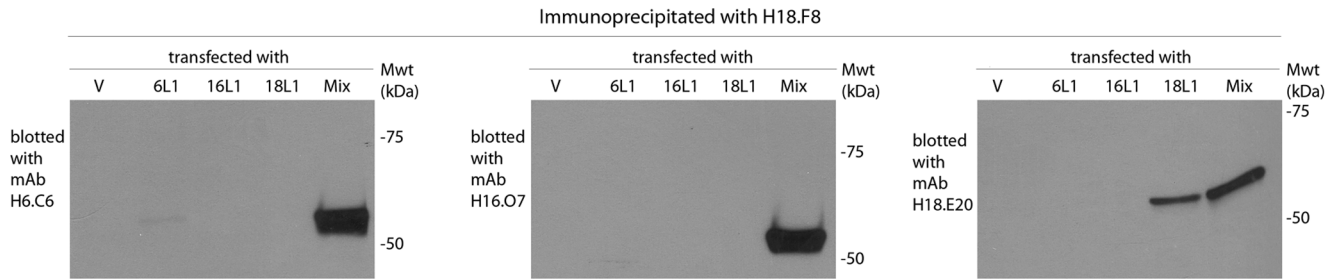

**Figure 5. Interaction between HPV18 L1 with L1 of both HPV6 and HPV16.** To test for interaction between L1 proteins of different HPV genotypes, 293TT cells were transfected with empty DNA vector (V), or vector expressing HPV6 L1, HPV16 L1, or HPV18 L1 individually (6L1, 16L1, 18L1, respectively), or all three together (Mix). Two days later, the cells were harvested and lysed. HPV18 L1 was immune-precipitated from lysates using the conformationally-dependent and neutralizing monoclonal antibody H18.F8. The presence of HPV6 L1, HPV16 L1 and HPV18 L1 in the immune-precipitates was detected by Western blotting with H6.C6 (left panel), H16.O7 (middle panel), and H18.E20 (right panel) respectively. doi:10.1371/journal.pone.0060507.g005

approaches previously tested clinically for DNA vaccine delivery; gene gun and *in vivo* electroporation. While gene gun vaccination demonstrated strong neutralizing antibody responses with only 2 µg of HPV16 L1 DNA vaccine, this was the highest amount of DNA that could be loaded onto the gold particles. The *in vivo* electroporation approach required 10 µg of HPV16 L1 DNA vaccine to achieve a consistent and robust neutralizing antibody response (that was not significantly higher with 20 µg or 40 µg doses), and these titers were higher than for 2 µg maximal dose of HPV16 L1 DNA vaccine delivered via gene gun. Although electroporation clearly enhances the efficiency of *in vivo* transfection of cells with the DNA vaccine, it may also trigger local inflammation, cell death and recruitment of immune cells to enhance the immune response [42,43,44]. While L1 DNA vaccination clearly has potential as a heat stable and low cost vaccine, a requirement for *in vivo* electroporation would raise the cost and complexity of vaccination because of the need for an electroporation device and access to electricity. Delivery via a self-contained gene gun device like PD-10 is another option, but the DNA dose is much more limited than for *in vivo* electroporation.

Hitzeroth *et al* observed a very weak (titer of 1:50) and non-neutralizing antibody response to vaccination of mice i.m. twice with 100 µg of DNA expressing full length codon-optimized HPV16 L2 [79]. The L2×8 DNA vaccination failed to elicit a detectable neutralizing antibody titer (Figure 2). A possible reason for the lack of response is poor expression by the L2×8 construct as compared with full length HPV16 L2 is incorrect codon optimization resulting in poor expression. However, when we re-optimized codon usage in the L2×8 construct for mammalian expression and compared expression levels to the previous bacterial codon optimized construct there was no significant improvement in expression. There are negative transcription and translation regulating sequences in the L2 gene, and the L2×8 DNA constructs may therefore still contain 8-fold more negative regulatory sequences than HPV16 L2, even after the nucleotide sequence changes resulting from codon optimization. In addition, recent studies suggest the presence of a transmembrane-like domain within this region of L2 that may limit expression and/or antigen release [80]. The L2×8 protein exhibited extensive degradation when expressed in mammalian cells (Figure 2C), which may also contribute to its low level and immunogenicity. Finally, it is clear that L2×8 is substantially less immunogenic than L1 VLP as the L2×8 protein vaccine induces ~30-fold lower neutralizing antibody titers than Gardasil [49].

Previously it was shown that HPV6 L1 and HPV16 L1 can co-assemble forming hybrid VLP in yeast [73] and that co-expression

of either BPV1 or HPV11 L1 with HPV16 L1 reduces HPV16 L1 VLP assembly in 293T cells [74]. We also showed that HPV18 L1 binds to both HPV6 L1 and HPV16 L1 when co-expressed in 293TT cells (Figure 5). The interaction between L1 of different HPV types, i.e. heterotypic binding, likely reflects the high degree of sequence conservation of the internal L1 structure, and has a deleterious effect upon multivalent L1 DNA vaccination. Indeed, mice vaccinated with a mixture of three DNA vaccines expressing L1 of HPV6, HPV16 and HPV18 showed relatively reduced protection against HPV16 compared to the group vaccinated with single HPV16 L1 DNA. This was also the case for HPV18 L1, but not for HPV6 L1. Thus the interference was inconsistent, possibly reflecting different L1 expression levels and affinity for heterotypic L1 interaction. Vaccinating at different sites completely restored the induced neutralization titer to the levels obtained when vaccinating with a single construct (Figures 3 and Figure 4). This observation suggests that spatial separation of individual type L1 DNA vaccines during vaccination prevents the formation of heterotypic L1 interactions and aberrant assembly of chimeric VLP. Three HPV types were used in our experiments, but more HPV types covering most of oncogenic types could potentially be delivered by a multi-microneedle injector to spare the patient from receiving multiple injections at each visit.

The co-expression of the cognate L2 in each construct is a possible alternative to spatial separation of the L1 DNA vaccines of different genotypes during multivalent vaccination. While this approach enhanced the neutralizing antibody responses relative to a mixed multivalent L1 DNA vaccine, it did not achieve in all cases the titers obtained upon vaccinating with a single type or spatial separation with multivalent L1 DNA vaccination (Figure 3). Nevertheless, the titers achieved with a mixed multivalent L1+L2 vaccine were completely protective against vaginal HPV16 challenge upon passive transfer to naïve mice with 20 µl of serum whereas antiserum from mice administered with the mixed multivalent L1 vaccine was only partially protective (Figure 4). This protection data is consistent with the *in vitro* neutralization titers and suggests that only a low neutralizing antibody titer is required for complete protection. Further the protective response to the electroporation of the mixed multivalent L1+L2 vaccine was durable at 3 months after the final vaccination, suggesting that co-expression of L2 might be an alternative to administering each construct at a different site.

Both of the licensed HPV vaccines utilize an alum-based adjuvant and Cervarix also includes a TLR4 agonist, MPL. Naked DNA vaccines, delivered appropriately, can potentially activate TLR9 via CpG islands as well as cytoplasmic DNA sensors such as

DAI and AIM2 to enhance the immune response. However, we have not examined L1 DNA vaccination with alum and utilizing electroporation. Previously, it was found that mixing a hepatitis B DNA vaccine with aluminum phosphate improved the antibody titers ~10-fold relative to DNA alone injected i.m. without electroporation [81]. While the titers of neutralizing antibody induced by L1 DNA vaccines might be improved with adjuvant and utilizing electroporation to reach the levels produced by Gardasil, it is clear that the L1 DNA vaccines elicit completely protective responses. Passive transfer of 20 µl of serum from either L1 DNA or Gardasil vaccinated mice rendered naïve animals immune to vaginal challenge. This corresponds to a ~1:50 dilution in the mouse, indicating a robust response. Furthermore, while the studies demonstrate that neutralizing antibody is sufficient to mediate protection, it does not rule out a contribution of L1-specific T cell immune responses to protection in actively vaccinated mice. Further study is warranted to determine the relevance of L1-specific T cell immune responses to preventing HPV infections and the relative levels induced by L1 VLP protein and L1 DNA vaccination.

Safety issues and practical considerations surrounding the use of DNA as a vaccine need further consideration. Although it has not been an issue in clinical studies of naked DNA vaccines to date, the

potential for a low frequency of integration of the vaccine DNA into the host chromosome or the induction of anti-DNA antibodies to cause disease remains a concern. Standard i.m. injection of naked DNA is very inefficient because only a small fraction of DNA is taken up by cells and expressed, but advances in delivery technologies such as ballistic delivery and electroporation are beginning to overcome this barrier. Indeed, our results suggest that vaccinating at different sites with multi-type L1 or L1+L2 DNA vaccines and using electroporation to enhance delivery shows promise as a next generation HPV vaccine candidate.

## Acknowledgments

We thank Martin Müller (DKFZ), Christopher Buck and John Schiller (National Cancer Institute, Bethesda, MD) for sharing codon-optimized L1 and L2 genes.

## Author Contributions

Conceived and designed the experiments: KK, NDC, RBSR. Performed the experiments: KK, RJ, SJ, JWW. Analyzed the data: CW, KK, RJ, SJ, JWW, RBSR. Contributed reagents/materials/analysis tools: KK, CW, NDC, RBSR. Wrote the paper: KK, CW, NDC, RBSR.

## References

- Walboomers JM, Jacobs MV, Manos MM, Bosch FX, Kummer JA, et al. (1999) Human papillomavirus is a necessary cause of invasive cervical cancer worldwide. *The Journal of pathology* 189: 12–19.
- Moscicki AB (2010) Human papillomavirus disease and vaccines in adolescents. *Adolescent medicine: state of the art reviews* 21:347–363, x-xi.
- Parkin DM, Bray F (2006) Chapter 2: The burden of HPV-related cancers. *Vaccine* 24 Suppl 3: S3/11–25.
- Kreimer AR, Clifford GM, Boyle P, Franceschi S (2005) Human papillomavirus types in head and neck squamous cell carcinomas worldwide: a systematic review. *Cancer epidemiology, biomarkers & prevention: a publication of the American Association for Cancer Research, cosponsored by the American Society of Preventive Oncology* 14: 467–475.
- Kirnbauer R, Booy F, Cheng N, Lowy DR, Schiller JT (1992) Papillomavirus L1 major capsid protein self-assembles into virus-like particles that are highly immunogenic. *Proceedings of the National Academy of Sciences of the United States of America* 89: 12180–12184.
- Rose RC, Bonnez W, Reichman RC, Garcea RL (1993) Expression of human papillomavirus type 11 L1 protein in insect cells: in vivo and in vitro assembly of viruslike particles. *Journal of virology* 67: 1936–1944.
- Nardelli-Haeffliger D, Roden R, Balmelli C, Potts A, Schiller J, et al. (1999) Mucosal but not parenteral immunization with purified human papillomavirus type 16 virus-like particles induces neutralizing titers of antibodies throughout the estrous cycle of mice. *Journal of virology* 73: 9609–9613.
- Rose RC, Bonnez W, Da Rin C, McCance DJ, Reichman RC (1994) Serological differentiation of human papillomavirus types 11, 16 and 18 using recombinant virus-like particles. *The Journal of general virology* 75 (Pt 9): 2445–2449.
- Christensen ND, Reed CA, Cladel NM, Hall K, Leiserowitz GS (1996) Monoclonal antibodies to HPV-6 L1 virus-like particles identify conformational and linear neutralizing epitopes on HPV-11 in addition to type-specific epitopes on HPV-6. *Virology* 224: 477–486.
- Roden RB, Hubbert NL, Kirnbauer R, Christensen ND, Lowy DR, et al. (1996) Assessment of the serological relatedness of genital human papillomaviruses by hemagglutination inhibition. *Journal of virology* 70: 3298–3301.
- Roden RB, Greenstone HL, Kirnbauer R, Booy FP, Jessie J, et al. (1996) In vitro generation and type-specific neutralization of a human papillomavirus type 16 virion pseudotype. *Journal of virology* 70: 5875–5883.
- Burd EM (2003) Human papillomavirus and cervical cancer. *Clinical microbiology reviews* 16: 1–17.
- Munoz N, Bosch FX, Castellsague X, Diaz M, de Sanjose S, et al. (2004) Against which human papillomavirus types shall we vaccinate and screen? The international perspective. *International journal of cancer Journal international du cancer* 111: 278–285.
- Brown DR, Kjaer SK, Sigurdsson K, Iversen OE, Hernandez-Avila M, et al. (2009) The impact of quadrivalent human papillomavirus (HPV; types 6, 11, 16, and 18) L1 virus-like particle vaccine on infection and disease due to oncogenic nonvaccine HPV types in generally HPV-naïve women aged 16–26 years. *The Journal of infectious diseases* 199: 926–935.
- Smith JF, Brownlow M, Brown M, Kowalski R, Esser MT, et al. (2007) Antibodies from women immunized with Gardasil cross-neutralize HPV 45 pseudovirions. *Human vaccines* 3: 109–115.
- Longet S, Schiller JT, Bobst M, Jichlinski P, Nardelli-Haeffliger D (2011) A murine genital-challenge model is a sensitive measure of protective antibodies against human papillomavirus infection. *Journal of virology* 85: 13253–13259.
- Schiller JT, Lowy DR (2009) Immunogenicity testing in human papillomavirus virus-like-particle vaccine trials. *The Journal of infectious diseases* 200: 166–171.
- Campo MS, O'Neil BW, Grindlay GJ, Curtis F, Knowles G, et al. (1997) A peptide encoding a B-cell epitope from the N-terminus of the capsid protein L2 of bovine papillomavirus-4 prevents disease. *Virology* 234: 261–266.
- Kawana K, Yoshikawa H, Taketani Y, Yoshiike K, Kanda T (1999) Common neutralization epitope in minor capsid protein L2 of human papillomavirus types 16 and 6. *Journal of virology* 73: 6188–6190.
- Roden RB, Yutzy WH, Fallon R, Inglis S, Lowy DR, et al. (2000) Minor capsid protein of human genital papillomaviruses contains subdominant, cross-neutralizing epitopes. *Virology* 270: 254–257.
- Gambhira R, Karanam B, Jagu S, Roberts JN, Buck CB, et al. (2007) A protective and broadly cross-neutralizing epitope of human papillomavirus L2. *Journal of virology* 81: 13927–13931.
- Roden RB, Weissinger EM, Henderson DW, Booy F, Kirnbauer R, et al. (1994) Neutralization of bovine papillomavirus by antibodies to L1 and L2 capsid proteins. *Journal of virology* 68: 7570–7574.
- Jagu S, Karanam B, Gambhira R, Chivukula SV, Chaganti RJ, et al. (2009) Concatenated multitype L2 fusion proteins as candidate prophylactic pan-human papillomavirus vaccines. *Journal of the National Cancer Institute* 101: 782–792.
- Nieto K, Weghofer M, Sehr P, Ritter M, Sedlmeier S, et al. (2012) Development of AAVLP(HPV16/31L2) particles as broadly protective HPV vaccine candidate. *PLoS one* 7: e39741.
- Tumban E, Peabody J, Peabody DS, Chackerian B (2011) A pan-HPV vaccine based on bacteriophage PP7 VLPs displaying broadly cross-neutralizing epitopes from the HPV minor capsid protein, L2. *PLoS ONE* 6: e23310.
- Schellenbacher C, Roden R, Kirnbauer R (2009) Chimeric L1–L2 virus-like particles as potential broad-spectrum human papillomavirus vaccines. *Journal of virology* 83: 10085–10095.
- Parkin DM (2006) The global health burden of infection-associated cancers in the year 2002. *International journal of cancer Journal international du cancer* 118: 3030–3044.
- Li M, Cripe TP, Estes PA, Lyon MK, Rose RC, et al. (1997) Expression of the human papillomavirus type 11 L1 capsid protein in *Escherichia coli*: characterization of protein domains involved in DNA binding and capsid assembly. *Journal of virology* 71: 2988–2995.
- Chen XS, Casini G, Harrison SC, Garcea RL (2001) Papillomavirus capsid protein expression in *Escherichia coli*: purification and assembly of HPV11 and HPV16 L1. *Journal of molecular biology* 307: 173–182.
- Schadlich L, Senger T, Kirschning CJ, Muller M, Gissmann L (2009) Refining HPV 16 L1 purification from *E. coli*: reducing endotoxin contaminations and their impact on immunogenicity. *Vaccine* 27: 1511–1522.

31. Abdulhaqq SA, Weiner DB (2008) DNA vaccines: developing new strategies to enhance immune responses. *Immunologic research* 42: 219–232.
32. Schadlich L, Senger T, Gerlach B, Mucke N, Klein C, et al. (2009) Analysis of modified human papillomavirus type 16 L1 capsomeres: the ability to assemble into larger particles correlates with higher immunogenicity. *Journal of virology* 83: 7690–7705.
33. Hemmi H, Takeuchi O, Kawai T, Kaisho T, Sato S, et al. (2000) A Toll-like receptor recognizes bacterial DNA. *Nature* 408: 740–745.
34. Krug A, French AR, Barchet W, Fischer JA, Dzionic A, et al. (2004) TLR9-dependent recognition of MCMV by IPC and DC generates coordinated cytokine responses that activate antiviral NK cell function. *Immunity* 21: 107–119.
35. Krug A, Luker GD, Barchet W, Leib DA, Akira S, et al. (2004) Herpes simplex virus type 1 activates murine natural interferon-producing cells through toll-like receptor 9. *Blood* 103: 1433–1437.
36. Lund J, Sato A, Akira S, Medzhitov R, Iwasaki A (2003) Toll-like receptor 9-mediated recognition of Herpes simplex virus-2 by plasmacytoid dendritic cells. *The Journal of experimental medicine* 198: 513–520.
37. Rathinam VA, Jiang Z, Waggoner SN, Sharma S, Cole LE, et al. (2010) The AIM2 inflammasome is essential for host defense against cytosolic bacteria and DNA viruses. *Nature immunology* 11: 395–402.
38. Ishikawa H, Barber GN (2008) STING is an endoplasmic reticulum adaptor that facilitates innate immune signalling. *Nature* 455: 674–678.
39. Peng B, Zhao Y, Lu H, Pang W, Xu Y (2005) In vivo plasmid DNA electroporation resulted in transfection of satellite cells and lasting transgene expression in regenerated muscle fibers. *Biochemical and biophysical research communications* 338: 1490–1498.
40. Fuller DH, Loudon P, Schmaljohn C (2006) Preclinical and clinical progress of particle-mediated DNA vaccines for infectious diseases. *Methods* 40: 86–97.
41. Steele KE, Stabler K, VanderZanden L (2001) Cutaneous DNA vaccination against Ebola virus by particle bombardment: histopathology and alteration of CD3-positive dendritic epidermal cells. *Veterinary pathology* 38: 203–215.
42. Mir LM, Bureau MF, Gehl J, Rangara R, Rouy D, et al. (1999) High-efficiency gene transfer into skeletal muscle mediated by electric pulses. *Proceedings of the National Academy of Sciences of the United States of America* 96: 4262–4267.
43. Cukjati D, Batuskaite D, Andre F, Miklavcic D, Mir LM (2007) Real time electroporation control for accurate and safe in vivo non-viral gene therapy. *Bioelectrochemistry* 70: 501–507.
44. Trollet C, Bloquel C, Scherman D, Bigey P (2006) Electrotransfer into skeletal muscle for protein expression. *Current gene therapy* 6: 561–578.
45. Luxembourg A, Hannaman D, Ellefsen B, Nakamura G, Bernard R (2006) Enhancement of immune responses to an HBV DNA vaccine by electroporation. *Vaccine* 24: 4490–4493.
46. Otten G, Schaefer M, Doe B, Liu H, Srivastava I, et al. (2004) Enhancement of DNA vaccine potency in rhesus macaques by electroporation. *Vaccine* 22: 2489–2493.
47. Vasan S, Hurley A, Schlesinger SJ, Hannaman D, Gardiner DF, et al. (2011) In vivo electroporation enhances the immunogenicity of an HIV-1 DNA vaccine candidate in healthy volunteers. *PLoS one* 6: e19252.
48. Bagarazzi ML, Yan J, Morrow MP, Shen X, Parker RL, et al. (2012) Immunotherapy Against HPV16/18 Generates Potent TH1 and Cytotoxic Cellular Immune Responses. *Science translational medicine* 4: 155ra138.
49. Jagu S, Kwak K, Karanam B, Huh WK, Damocharan V, et al. (2013) Optimization of Multimeric Human Papillomavirus L2 Vaccines. *PLoS ONE* 8: e55338.
50. Sundaram P, Tigelaar RE, Xiao W, Brandsma JL (1998) Intracutaneous vaccination of rabbits with the E6 gene of cottontail rabbit papillomavirus provides partial protection against virus challenge. *Vaccine* 16: 613–623.
51. Donnelly JJ, Martinez D, Jansen KU, Ellis RW, Montgomery DL, et al. (1996) Protection against papillomavirus with a polynucleotide vaccine. *The Journal of infectious diseases* 173: 314–320.
52. Low L, Mander A, McCann K, Dearnaley D, Tjelle T, et al. (2009) DNA vaccination with electroporation induces increased antibody responses in patients with prostate cancer. *Human gene therapy* 20: 1269–1278.
53. Dolter KE, Evans CF, Ellefsen B, Song J, Boente-Carrera M, et al. (2011) Immunogenicity, safety, biodistribution and persistence of ADVAX, a prophylactic DNA vaccine for HIV-1, delivered by in vivo electroporation. *Vaccine* 29: 795–803.
54. Sardesai NY, Weiner DB (2011) Electroporation delivery of DNA vaccines: prospects for success. *Current opinion in immunology* 23: 421–429.
55. Zhou J, Liu WJ, Peng SW, Sun XY, Frazer I (1999) Papillomavirus capsid protein expression level depends on the match between codon usage and tRNA availability. *Journal of virology* 73: 4972–4982.
56. Liu WJ, Zhao KN, Gao FG, Leggett GR, Fernando GJ, et al. (2001) Polynucleotide viral vaccines: codon optimisation and ubiquitin conjugation enhances prophylactic and therapeutic efficacy. *Vaccine* 20: 862–869.
57. Leder C, Kleinschmidt JA, Wiethe C, Muller M (2001) Enhancement of capsid gene expression: preparing the human papillomavirus type 16 major structural gene L1 for DNA vaccination purposes. *Journal of virology* 75: 9201–9209.
58. Pastrana DV, Buck CB, Pang YY, Thompson CD, Castle PE, et al. (2004) Reactivity of human sera in a sensitive, high-throughput pseudovirus-based papillomavirus neutralization assay for HPV16 and HPV18. *Virology* 321: 205–216.
59. Kimbaurer R, Taub J, Greenstone H, Roden R, Durst M, et al. (1993) Efficient self-assembly of human papillomavirus type 16 L1 and L1-L2 into virus-like particles. *Journal of virology* 67: 6929–6936.
60. Hitzeroth II, Passmore JA, Shephard E, Stewart D, Muller M, et al. (2009) Immunogenicity of an HPV-16 L2 DNA vaccine. *Vaccine* 27: 6432–6434.
61. Kim D, Gambhira R, Karanam B, Monic A, Hung CF, et al. (2008) Generation and characterization of a preventive and therapeutic HPV DNA vaccine. *Vaccine* 26: 351–360.
62. Cristillo AD, Ferrari MG, Hudacik L, Lewis B, Galmin L, et al. (2011) Induction of mucosal and systemic antibody and T-cell responses following prime-boost immunization with novel adjuvanted human immunodeficiency virus-1-vaccine formulations. *The Journal of general virology* 92: 128–140.
63. Ledgerwood JE, Wei CJ, Hu Z, Gordon IJ, Enama ME, et al. (2011) DNA priming and influenza vaccine immunogenicity: two phase 1 open label randomised clinical trials. *The Lancet infectious diseases* 11: 916–924.
64. Bernard HU, Burk RD, Chen Z, van Doorslaer K, Hausen H, et al. (2010) Classification of papillomaviruses (PVs) based on 189 PV types and proposal of taxonomic amendments. *Virology* 401: 70–79.
65. Geraets D, Alemany L, Guimera N, de Sanjose S, de Koning M, et al. (2012) Detection of rare and possibly carcinogenic human papillomavirus genotypes as single infections in invasive cervical cancer. *The Journal of pathology*.
66. Okun MM, Day PM, Greenstone HL, Booy FP, Lowy DR, et al. (2001) L1 interaction domains of papillomavirus L2 necessary for viral genome encapsidation. *J Virol* 75: 4332–4342.
67. Finnen RL, Erickson KD, Chen XS, Garcea RL (2003) Interactions between papillomavirus L1 and L2 capsid proteins. *J Virol* 77: 4818–4826.
68. Chen HS, Bromberg-White J, Conway MJ, Alam S, Meyers C (2010) Study of infectious virus production from HPV18/16 capsid chimeras. *Virology* 405: 289–299.
69. Kimbaurer R, Taub J, Greenstone H, Roden R, Durst M, et al. (1993) Efficient self-assembly of human papillomavirus type 16 L1 and L1-L2 into virus-like particles. *J Virol* 67: 6929–6936.
70. Roberts JN, Buck CB, Thompson CD, Kines R, Bernardo M, et al. (2007) Genital transmission of HPV in a mouse model is potentiated by nonoxynol-9 and inhibited by carrageenan. *Nat Med* 13: 857–861.
71. Gambhira R, Karanam B, Jagu S, Roberts JN, Buck CB, et al. (2007) A protective and broadly cross-neutralizing epitope of Human Papillomavirus L2. *J Virol* 81: 13927–13931.
72. Day PM, Kines RC, Thompson CD, Jagu S, Roden RB, et al. (2010) In vivo mechanisms of vaccine-induced protection against HPV infection. *Cell Host Microbe* 8: 260–270.
73. Buonamassa DT, Greer CE, Capo S, Yen TS, Galeotti CL, et al. (2002) Yeast coexpression of human papillomavirus types 6 and 16 capsid proteins. *Virology* 293: 335–344.
74. Gasparic M, Rubio I, Thones N, Gissmann L, Muller M (2007) Prophylactic DNA immunization against multiple papillomavirus types. *Vaccine* 25: 4540–4553.
75. Senger T, Becker MR, Schadlich L, Waterboer T, Gissmann L (2009) Identification of B-cell epitopes on virus-like particles of cutaneous alpha-human papillomaviruses. *Journal of virology* 83: 12692–12701.
76. Fleury MJ, Touze A, Maurel MC, Moreau T, Coursaget P (2009) Identification of neutralizing conformational epitopes on the human papillomavirus type 31 major capsid protein and functional implications. *Protein science: a publication of the Protein Society* 18: 1425–1438.
77. Bishop B, Dasgupta J, Klein M, Garcea RL, Christensen ND, et al. (2007) Crystal structures of four types of human papillomavirus L1 capsid proteins: understanding the specificity of neutralizing monoclonal antibodies. *The Journal of biological chemistry* 282: 31803–31811.
78. Christensen ND, Dillner J, Eklund C, Carter JJ, Wipf GC, et al. (1996) Surface conformational and linear epitopes on HPV-16 and HPV-18 L1 virus-like particles as defined by monoclonal antibodies. *Virology* 223: 174–184.
79. Hitzeroth II, Passmore JA, Shephard E, Stewart D, Muller M, et al. (2009) Immunogenicity of an HPV-16 L2 DNA vaccine. *Vaccine* 27: 6432–6434.
80. Bronnimann MP, Chapman JA, Park CK, Campos SK (2013) A Transmembrane Domain and GxxxG Motifs within L2 Are Essential for Papillomavirus Ulmer. *Journal of virology* 87: 464–473.
81. Ulmer JB, DeWitt CM, Chastain M, Friedman A, Donnelly JJ, et al. (1999) Enhancement of DNA vaccine potency using conventional aluminum adjuvants. *Vaccine* 18: 18–28.
